# Supplementary material for: Doped hole injection bilayers for solution processable blue phosphorescent organic light-emitting diodes
Source: Royal Society of Chemistry journal article supplement (doi:10.1039/c6tc01624c), 2016-01-01
Supplement: c6tc01624c1.pdf [file c6tc01624c1.pdf]

## Supporting Information

### **Doped hole injection bilayer for solution processable blue phosphorescent organic light-emitting diodes**

Bo Wang, Lei Zhang, Yun Hu, Xiao-Bo Shi, Zhao-Kui Wang,\* and Liang-Sheng Liao\*

Jiangsu Key Laboratory for Carbon-Based Functional Materials & Devices, Institute of Functional Nano & Soft Materials (FUNSOM), and Collaborative Innovation Center of Suzhou Nano Science and Technology, Soochow University, Suzhou, Jiangsu 215123, China

\*Address all correspondence to the authors. Email: [lsiao@suda.edu.cn](mailto:lsiao@suda.edu.cn); [zkwang@suda.edu.cn](mailto:zkwang@suda.edu.cn)

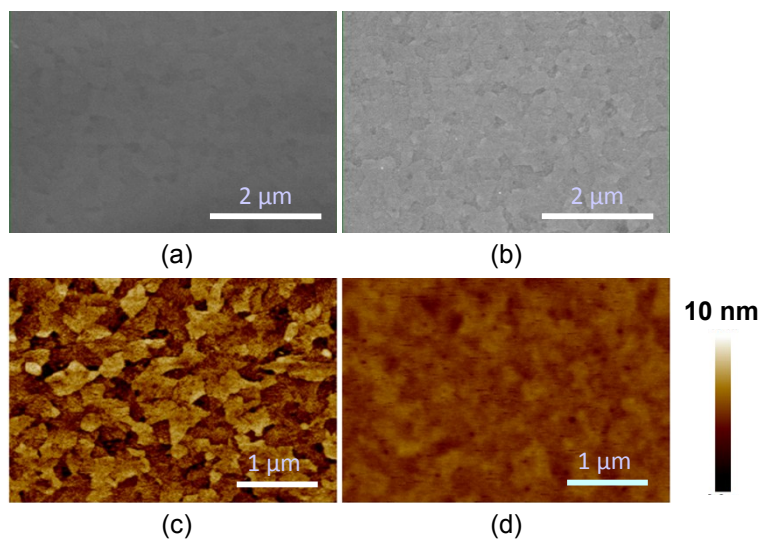

Figure S1 The SEM/AFM surface images of (a)/(c) ITO/HAT-CN: F<sub>4</sub>-TCNQ/TS-CuPc: MoO<sub>3</sub> and (b)/ (d) ITO/HAT-CN: F<sub>4</sub>-TCNQ/TS-CuPc: MoO<sub>3</sub>/TCTA: Flrpic.

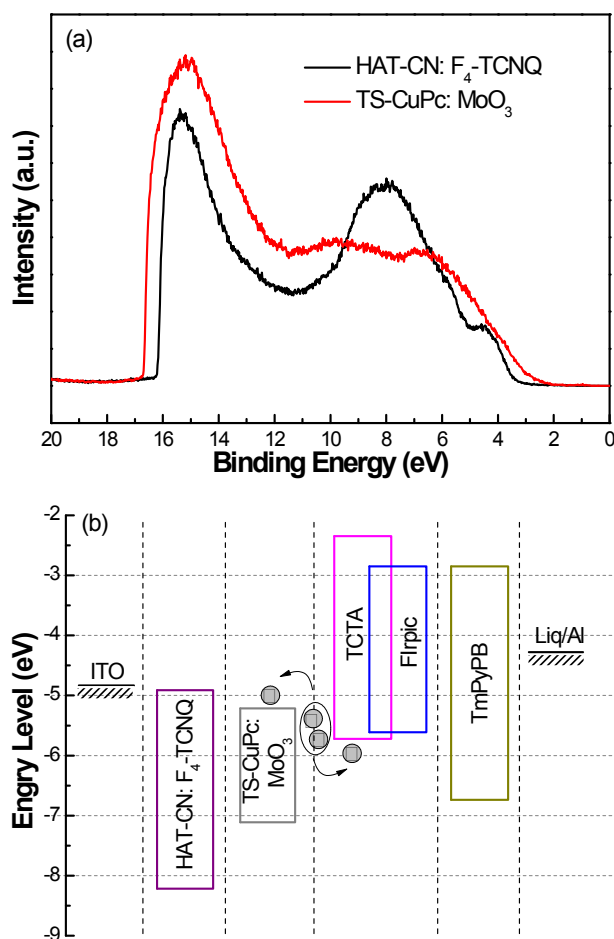

Figure S2 (a) UPS spectra of HAT-CN: F<sub>4</sub>-TCNQ and TS-CuPc: MoO<sub>3</sub> and (b) energy levels of the device.

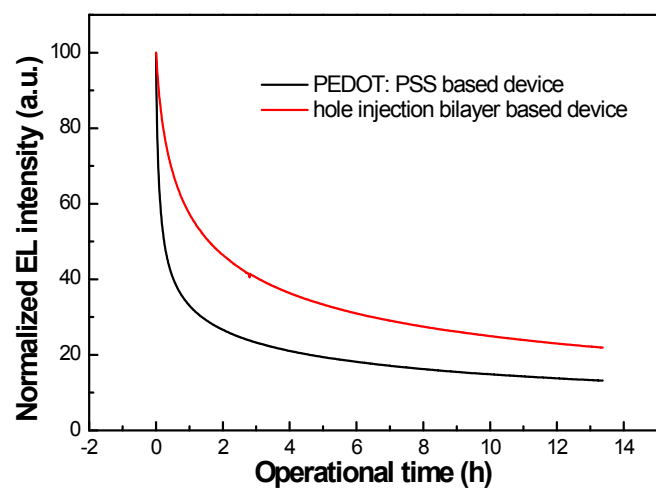

Figure S3 Lifetime of PEDOT: PSS based device and hole injection bilayer based device.
